# Supplementary material for: Impact of prenatal phthalate exposure on newborn metabolome and infant neurodevelopment
Source: Springer Nature journal article supplement (doi:10.1038/s41467-025-57273-z), 2025-04-02
Supplement: MOESM1 [file 41467_2025_57273_MOESM1_ESM.pdf]

## Impact of Prenatal Phthalate Exposure on Newborn Metabolome and Infant Neurodevelopment

Susan S. Hoffman<sup>1</sup>, Ziyin Tang<sup>2</sup>, Anne Dunlop<sup>3</sup>, Patricia A. Brennan<sup>4</sup>, Thompson Huynh<sup>2</sup>, Stephanie M. Eick<sup>2</sup>, Dana B. Barr<sup>2</sup>, Blake Rushing<sup>5,6</sup>, Susan L. McRitchie<sup>6</sup>, Susan Sumner<sup>5,6</sup>, Kaitlin R. Taibl<sup>2</sup>, Youran Tan<sup>2</sup>, Parinya Panuwet<sup>2</sup>, Grace E. Lee<sup>2</sup>, Jasmin Eatman<sup>2</sup>, Elizabeth J. Corwin<sup>7</sup>, P. Barry Ryan<sup>2</sup>, Dean P. Jones<sup>8</sup>, Donghai Liang<sup>\*2,1</sup>

<sup>1</sup>Department of Epidemiology, Emory University, Atlanta, GA, USA

<sup>2</sup>Gangarosa Department of Environmental Health, Emory University, Atlanta, GA, USA

<sup>3</sup>Department of Gynecology and Obstetrics, School of Medicine, Emory University, Atlanta, GA, USA

<sup>4</sup>Department of Psychology, Emory University, Atlanta, GA, USA

<sup>5</sup>Department of Nutrition, University of North Carolina at Chapel Hill, Chapel Hill, NC, USA

<sup>6</sup>Nutrition Research Institute, University of North Carolina at Chapel Hill, Kannapolis, NC, USA

<sup>7</sup>School of Nursing, Columbia University, New York, NY, USA

<sup>8</sup>School of Medicine, Emory University, Atlanta, GA, USA

*\*Corresponding author:*

Donghai Liang

Gangarosa Department of Environmental Health; Department of Epidemiology

Emory University Rollins School of Public Health

1518 Clifton Rd, Rm 2037

Atlanta, GA 30322, USA

donghai.liang@emory.edu

## Supplementary material

Table S1. Metabolites of the selected diesters of phthalates<sup>8</sup> and their primary uses<sup>94</sup>

| Phthalate Diester                | Metabolite                                      | Where it can be found                                                                          |
|----------------------------------|-------------------------------------------------|------------------------------------------------------------------------------------------------|
| Diethyl phthalate (DEP)          | Monoethyl phthalate (MEP)                       | Toothbrushes; automobile parts; tools; toys; food; packaging; cosmetics; insecticides; aspirin |
| Dibutyl phthalate (DBP)          | Mono-n-butyl phthalate (MBP)                    | Nail polish; plasticizer; adhesive and printing ink additive                                   |
| Di-iso-butyl phthalate (DiBP)    | Monoisobutyl phthalate (MiBP)                   | Plasticizer; adhesive                                                                          |
| Benzylbutyl phthalate (BBzP)     | Monobenzyl phthalate (MBzP)                     | Plasticizer; sealants; paints                                                                  |
| di-2-ethylhexyl phthalate (DEHP) | Mono-2-ethylhexyl phthalate (MEHP)              | Plasticizer                                                                                    |
| Di-2-ethylhexyl phthalate (DEHP) | Mono-2-ethyl-5-oxohexyl phthalate (MEOHP)*      | Plasticizer                                                                                    |
| Di-2-ethylhexyl phthalate (DEHP) | Mono-2-ethyl-5-hydroxyhexyl phthalate (MEHHP)*  | Plasticizer                                                                                    |
| Di-2-ethylhexyl phthalate (DEHP) | Mono-2-ethyl-5-carboxypentyl phthalate (MECPP)* | Plasticizer                                                                                    |

\*Secondary metabolite

Table S2. Characteristics of the Atlanta African American Maternal-Child Cohort, 2016-2018, compared to the sample population. The cohort sample consisted of 547 participants. The main sample was used for the metabolomic-wide association study (MWAS) and analyzed independently at two different time points (visit 1 n = 216; visit 2 n = 145). The subset was used for the meet-in-the-middle analysis, analyzed separately at the two study visits (visit 1 subset n = 81; visit 2 subset n = 71). Atlanta African American Maternal-Child cohort, 2016-2018.

| Characteristic | Cohort<br>n = 547 | Visit 1 (8-14 weeks) |             | Visit 2 (24-30 weeks) |             |
|----------------|-------------------|----------------------|-------------|-----------------------|-------------|
|                |                   | Main sample =<br>216 | Subset = 81 | Main sample = 145     | Subset = 71 |
|                | Median (IQR)      | Median (IQR)         |             | Median (IQR)          |             |

|                                        |                                                     |                     |                     |                      |                      |
|----------------------------------------|-----------------------------------------------------|---------------------|---------------------|----------------------|----------------------|
| Age at enrollment                      | 24.0 (21.0, 28.0)                                   | 24 (21.0, 29.0)     | 24.0 (21.0, 29.0)   | 24 (21.0, 29.0)      | 24 (21.0, 29.0)      |
| Pre-pregnancy BMI (kg/m <sup>2</sup> ) | 27 (22, 34)                                         | 28 (23, 34)         | 27 (24, 34)         | 26 (22, 33)          | 26 (23, 34)          |
| Gestational Age                        | V1: 11.29 (9.43, 12.86)<br>V2: 26.00 (24.57, 28.14) | 11.29 (9.29, 13.00) | 11.57 (9.29, 13.29) | 25.43 (24.57, 27.57) | 25.43 (24.36, 27.36) |
| Creatinine (mg/dL)                     | #                                                   | 178 (122, 228)      | 180 (128, 229)      | 139 (100, 202)       | 143 (100, 205)       |
|                                        | n (%)                                               | n (%)               |                     | n (%)                |                      |
| Education                              |                                                     |                     |                     |                      |                      |
| < High school                          | 87 (16)                                             | 34 (16)             | 11 (14)             | 20 (14)              | 8 (11)               |
| High school                            | 213 (39)                                            | 91 (42)             | 35 (43)             | 58 (40)              | 31 (44)              |
| Some college or more                   | 247 (45)                                            | 91 (42)             | 35 (43)             | 67 (46)              | 32 (45)              |
| Parity                                 |                                                     |                     |                     |                      |                      |
| No prior birth                         | 254 (46)                                            | 92 (43)             | 33 (41)             | 61 (42)              | 30 (42)              |
| Prior birth                            | 293 (54)                                            | 124 (57)            | 48 (59)             | 84 (58)              | 41 (58)              |
| Alcohol use                            |                                                     |                     |                     |                      |                      |
| No                                     | 483 (88)                                            | 194 (90)            | 72 (89)             | 130 (90)             | 63 (89)              |
| Yes                                    | 64 (12)                                             | 22 (10)             | 9 (11)              | 15 (10)              | 8 (11)               |
| Tobacco use                            |                                                     |                     |                     |                      |                      |
| No                                     | 452 (83)                                            | 177 (82)            | 69 (85)             | 123 (85)             | 62 (89)              |
| Yes                                    | 95 (17)                                             | 39 (18)             | 12 (15)             | 22 (15)              | 9 (13)               |
| Marijuana use                          |                                                     |                     |                     |                      |                      |
| No                                     | 364 (67)                                            | 128 (59)            | 51 (63)             | 89 (61)              | 45 (63)              |
| Yes                                    | 183 (33)                                            | 88 (41)             | 30 (37)             | 56 (39)              | 26 (37)              |
| Sex of baby                            |                                                     |                     |                     |                      |                      |
| Male                                   | 257 (47)                                            | 102 (47)            | 43 (53)             | 68 (47)              | 35 (49)              |

|                |          |          |         |         |         |
|----------------|----------|----------|---------|---------|---------|
| <i>Female</i>  | 272 (50) | 114 (53) | 38 (47) | 77 (53) | 36 (51) |
| <i>Unknown</i> | 18 (3)   | 0 (0)    | 0 (0)   | 0 (0)   | 0 (0)   |

BMI = body mass index (calculated as weight in kilograms divided by height in meters squared)

# = Data not available at the cohort level

*Table S3.* Exposure information in the subset selected for the meet-in-the-middle analysis (visit 1 n = 81; visit 2 n = 71). All phthalate metabolites were found in 100% of samples. Atlanta African American Maternal-Child cohort, 2016-2018.

| <b>Metabolite (ng/ml)</b>                                     | <b>Visit 1 (8-14 weeks)<br/>n = 81</b> |      | <b>Visit 2 (24-30 weeks)<br/>n = 71</b> |      |
|---------------------------------------------------------------|----------------------------------------|------|-----------------------------------------|------|
|                                                               | Median (IQR)                           | GM   | Median (IQR)                            | GM   |
| Monoethyl phthalate (MEP)                                     | 110 (39, 284)                          | 114  | 86 (39, 211)                            | 95   |
| Mono-n-butyl phthalate (MBP)                                  | 11 (6, 23)                             | 9.9  | 10 (4, 26)                              | 9.1  |
| Monoisobutyl phthalate (MiBP)                                 | 9 (3, 20)                              | 9.1  | 8 (3, 17)                               | 8.3  |
| Monobenzyl phthalate (MBzP)                                   | 6 (3, 14)                              | 6.3  | 5 (2, 13)                               | 5.9  |
| Mono-2-ethylhexyl phthalate (MEHP)                            | 2 (0.7, 5)                             | 1.7  | 2 (0.8, 4)                              | 1.8  |
| Mono-2-ethyl-5-oxohexyl phthalate (MEOHP)*                    | 3 (2, 7)                               | 3.4  | 3 (2, 7)                                | 3.0  |
| Mono-2-ethyl-5-hydroxyhexyl phthalate (MEHHP)*                | 6 (3, 11)                              | 5.6  | 5 (2, 9)                                | 4.0  |
| Mono-2-ethyl-5-carboxypentyl phthalate (MECPP)*               | 7 (4, 15)                              | 8.6  | 7 (4, 11)                               | 7.1  |
| Sum of Di-2-ethylhexyl phthalate metabolites ( $\Sigma$ DEHP) | 0.07 (0.03, 0.12)                      | 0.07 | 0.05 (0.03, 0.1)                        | 0.06 |

\*Secondary metabolite; GM = geometric mean

*Table S4.* The number of metabolic features significantly associated ( $p < 0.05$  or FDR corrected  $q < 0.2$ ) with phthalate exposure levels in the full sample (visit 1  $n = 216$ ; visit 2  $n = 145$ ) using generalized linear models. These features were used for the pathway analysis and metabolite annotation. Source data is available in the Source Data files. Atlanta African American Maternal-Child cohort, 2016-2018.

| Exposure of interest | Significance threshold |           |
|----------------------|------------------------|-----------|
|                      | $p < 0.05$             | $q < 0.2$ |
| <b>MEP</b>           |                        |           |
| <i>Visit 1</i>       | 224                    | 0         |
| <i>Visit 2</i>       | 260                    | 14        |
| <b>MBP</b>           |                        |           |
| <i>Visit 1</i>       | 687                    | 265       |
| <i>Visit 2</i>       | 354                    | 4         |
| <b>MiBP</b>          |                        |           |
| <i>Visit 1</i>       | 282                    | 1         |
| <i>Visit 2</i>       | 634                    | 0         |
| <b>MBzP</b>          |                        |           |
| <i>Visit 1</i>       | 349                    | 5         |
| <i>Visit 2</i>       | 304                    | 2         |
| <b>MEHP</b>          |                        |           |
| <i>Visit 1</i>       | 501                    | 49        |
| <i>Visit 2</i>       | 349                    | 0         |
| <b>MEOHP</b>         |                        |           |
| <i>Visit 1</i>       | 289                    | 3         |
| <i>Visit 2</i>       | 426                    | 29        |
| <b>MEHHP</b>         |                        |           |
| <i>Visit 1</i>       | 292                    | 0         |
| <i>Visit 2</i>       | 304                    | 0         |

|                |     |    |
|----------------|-----|----|
| <b>MECPP</b>   |     |    |
| <b>Visit 1</b> | 394 | 1  |
| <b>Visit 2</b> | 488 | 33 |
| <b>ΣDEHP</b>   |     |    |
| <b>Visit 1</b> | 365 | 1  |
| <b>Visit 2</b> | 393 | 12 |

Note: MEP = Monoethyl phthalate; MBP = Mono-n-butyl phthalate; MiBP = Monoisobutyl phthalate; MBzP = Monobenzyl phthalate; MEHP = Mono-2-ethylhexyl phthalate; MEOHP = Mono-2-ethyl-5-oxohexyl phthalate; MEHHP = Mono-2-ethyl-5-hydroxyhexyl phthalate; MECPP = Mono-2-ethyl-5-carboxypentyl phthalate; ΣDEHP = Sum of Di-2-ethylhexyl phthalate metabolites.

*Table S5.* The number of metabolic features significantly associated ( $p < 0.05$ ) with both phthalate exposure levels and NICU Net Neurobehavioral Scale (NNS) scores in the subset (visit 1 subset  $n = 81$ ; visit 2 subset  $n = 71$ ) using generalized linear models. These features were used for the meet-in-the-middle analysis chemical annotation. Source data is available in the Source Data file. Atlanta African American Maternal-Child cohort, 2016-2018.

| Exposure of interest | Outcome   |         |
|----------------------|-----------|---------|
|                      | Attention | Arousal |
| <b>MEP</b>           |           |         |
| <b>Visit 1</b>       | 24        | 9       |
| <b>Visit 2</b>       | 10        | 19      |
| <b>MBP</b>           |           |         |
| <b>Visit 1</b>       | 21        | 16      |
| <b>Visit 2</b>       | 47        | 20      |
| <b>MiBP</b>          |           |         |
| <b>Visit 1</b>       | 18        | 10      |
| <b>Visit 2</b>       | 34        | 14      |
| <b>MBzP</b>          |           |         |
| <b>Visit 1</b>       | 6         | 16      |
| <b>Visit 2</b>       | 18        | 11      |
| <b>MEHP</b>          |           |         |

|                |    |    |
|----------------|----|----|
| <b>Visit 1</b> | 11 | 11 |
| <b>Visit 2</b> | 18 | 11 |
| <b>MEOHP</b>   |    |    |
| <b>Visit 1</b> | 2  | 10 |
| <b>Visit 2</b> | 13 | 12 |
| <b>MEHHP</b>   |    |    |
| <b>Visit 1</b> | 4  | 8  |
| <b>Visit 2</b> | 14 | 16 |
| <b>MECPP</b>   |    |    |
| <b>Visit 1</b> | 4  | 11 |
| <b>Visit 2</b> | 10 | 15 |
| <b>ΣDEHP</b>   |    |    |
| <b>Visit 1</b> | 4  | 10 |
| <b>Visit 2</b> | 9  | 11 |

Note: MEP = Monoethyl phthalate; MBP = Mono-n-butyl phthalate; MiBP = Monoisobutyl phthalate; MBzP = Monobenzyl phthalate; MEHP = Mono-2-ethylhexyl phthalate; MEOHP = Mono-2-ethyl-5-oxohexyl phthalate; MEHHP = Mono-2-ethyl-5-hydroxyhexyl phthalate; MECPP = Mono-2-ethyl-5-carboxypentyl phthalate; ΣDEHP = Sum of Di-2-ethylhexyl phthalate metabolites.

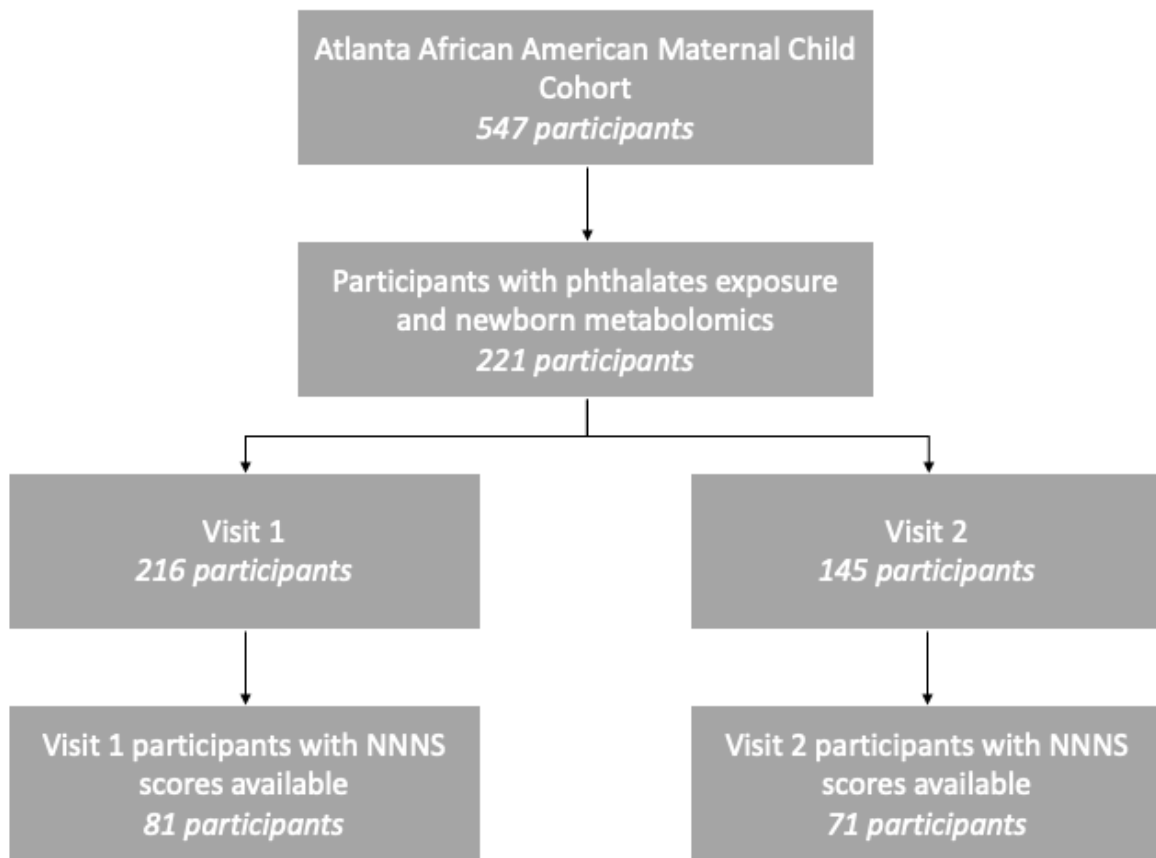

*Figure S1.* Population flowchart from the Atlanta African American Maternal-Child Cohort 2016-2018 (n=547) to the sample used in the metabolome-wide association study (MWAS) analysis (visit 1 n=216; visit 2 n=145) and the meet-in-the-middle (MITM) analysis (visit 1 n=81; visit 2 n=71)



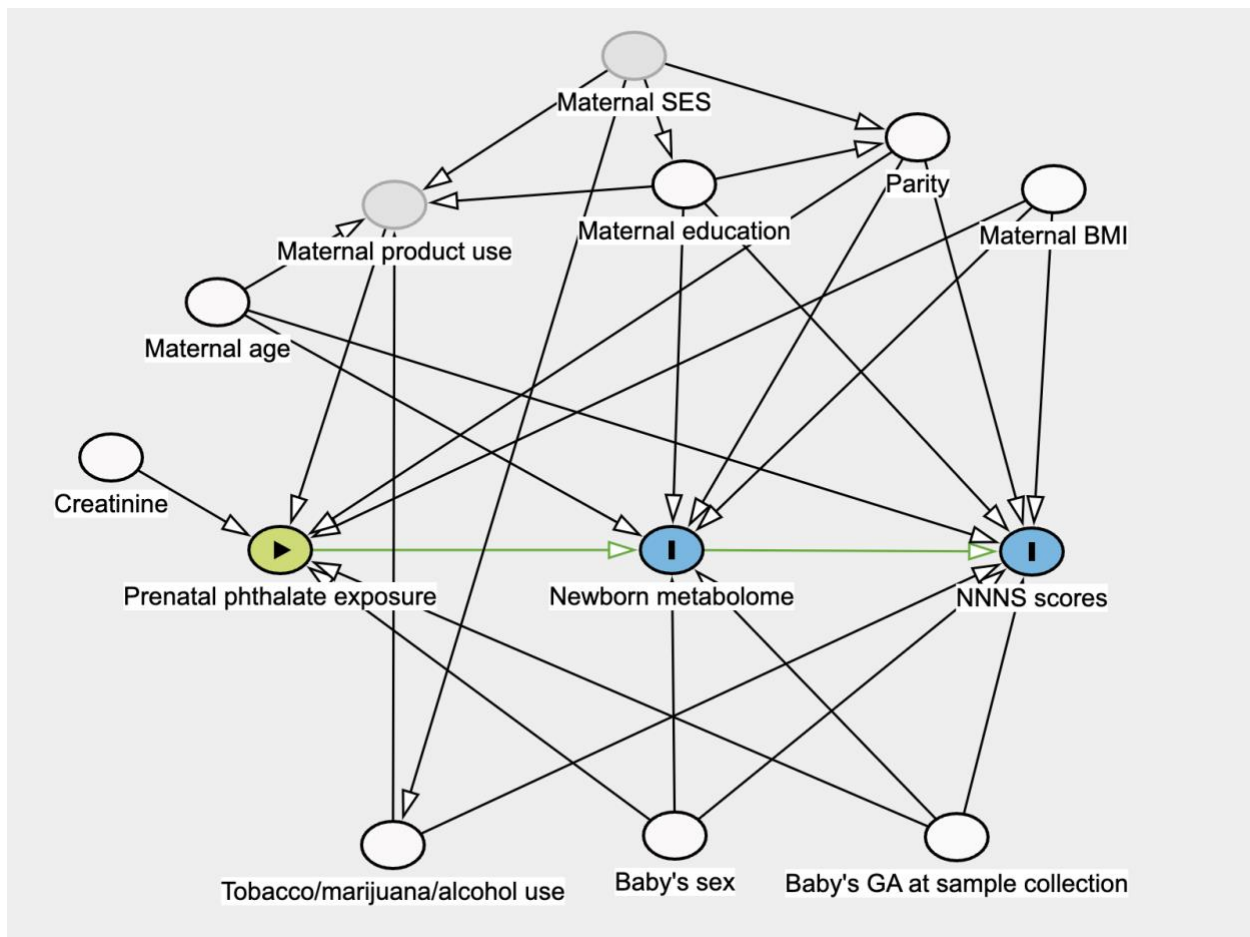

Figure S2. A directed acyclic graph (DAG) used for variable selection to control for confounding bias. Figure created using *dagitty* (<https://www.dagitty.net/dags.html>). Note: SES = socioeconomic status, GA = gestational age, BMI = body mass index, NNNS = NICU Net Neurobehavioral Scale

**Correlations Across Visits**

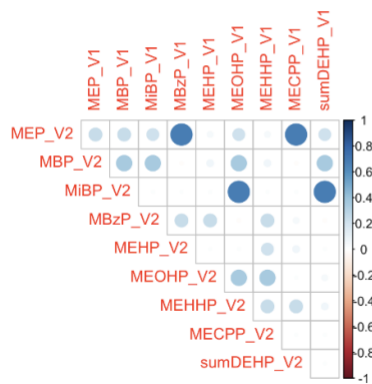

**Visit 1 Correlations**

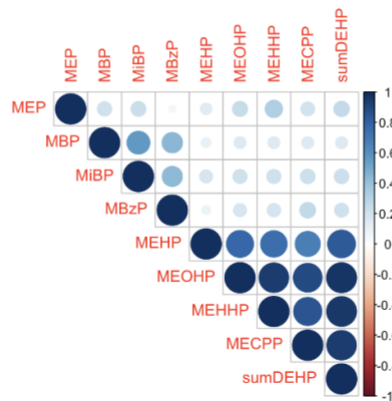

**Visit 2 Correlations**

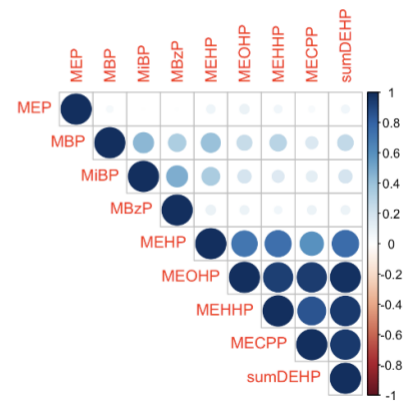

**Figure S3.** Correlations of phthalate metabolites across visits (n=140 matched participants) and within visits (visit 1 n = 216 and visit 2 n = 145)

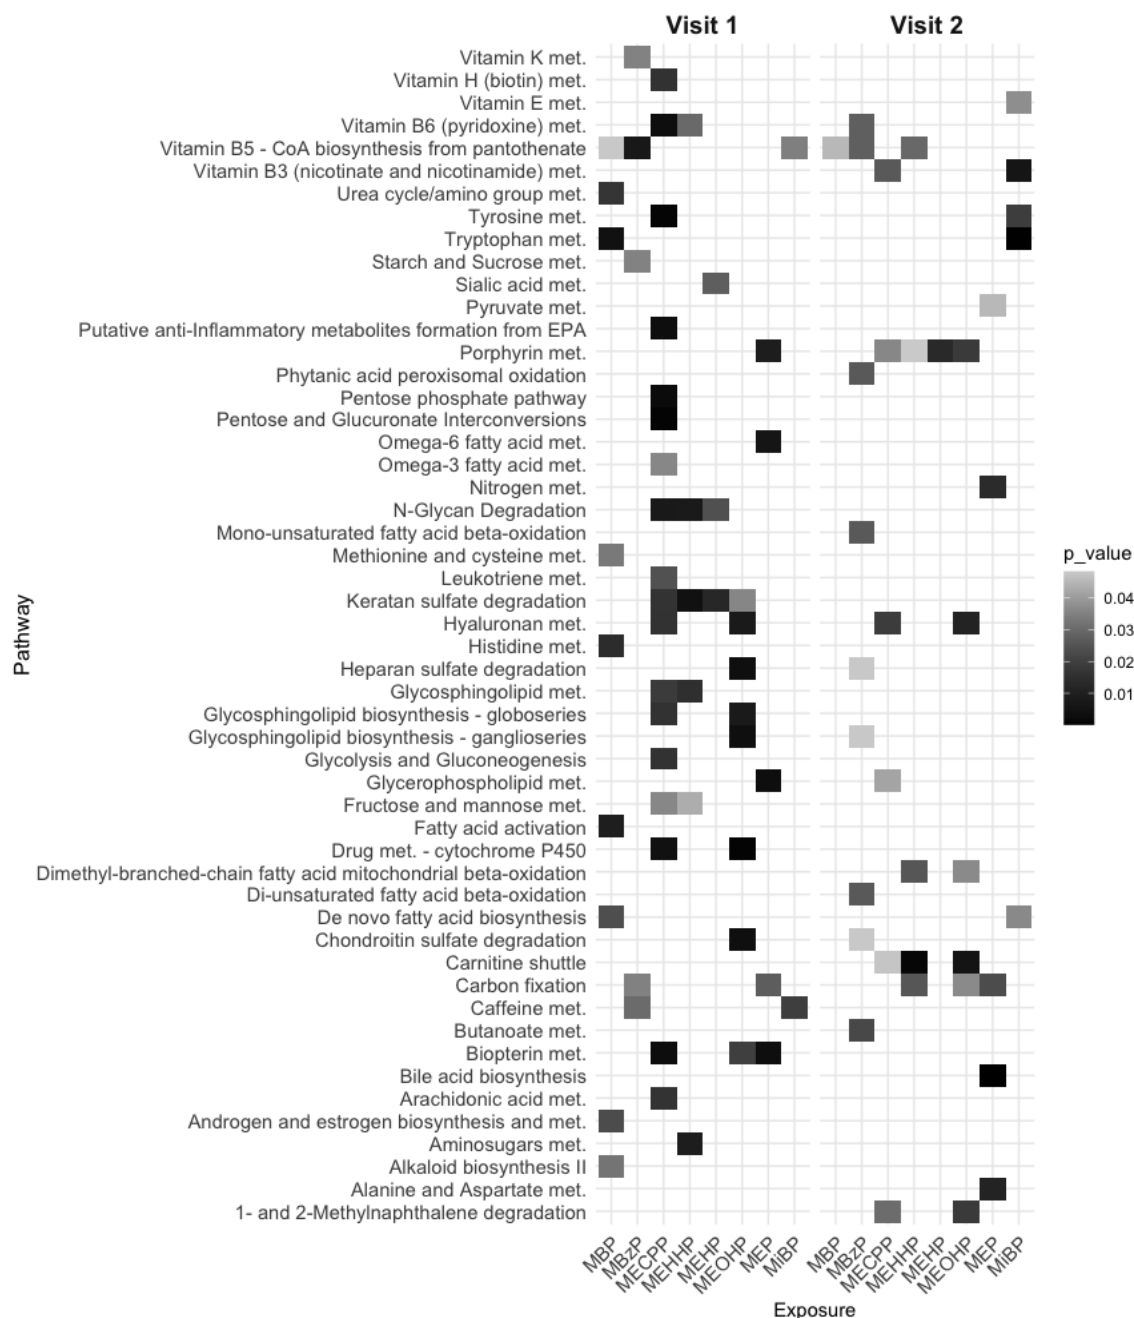

**Figure S4.** Biological pathways associated ( $p < 0.05$ ) with at least one phthalate metabolite at visit 1 ( $n = 216$ ) and visit 2 ( $n = 145$ ) from the pathway analysis utilizing the bioinformatics tool, *mummichog*. Pathway names are listed along the Y-axis. Each phthalate metabolite is along the x-axis. The greyscale relates to the p-value significance, with a darker color denoting a lower p-value. Note: met. = metabolism; MEP = Monoethyl phthalate; MBP = Mono-n-butyl phthalate; MiBP = Monoisobutyl phthalate; MBzP = Monobenzyl phthalate; MEHP = Mono-2-ethylhexyl phthalate; MEOHP = Mono-2-ethyl-5-oxohexyl phthalate; MEHHP = Mono-2-ethyl-5-hydroxyhexyl phthalate; MECPP = Mono-2-ethyl-5-carboxypentyl phthalate;  $\Sigma$ DEHP = Sum of Di-2-ethylhexyl phthalate metabolites. Atlanta African American Maternal-Child cohort, 2016-2018.
